# Supplementary material for: Older adults across the globe exhibit increased prosocial behavior but also greater in-group preferences
Source: PubMed Central journal article supplement (PMC10154238; doi:10.1038/s43587-021-00118-3), 2021-10-11
Supplement: 43587_2021_118_MOESM1_ESM.pdf [file 43587_2021_118_MOESM1_ESM.pdf]

---

**Supplementary information**

---

**Older adults across the globe exhibit increased prosocial behavior but also greater in-group preferences**

---

In the format provided by the authors and unedited

1 **Supplementary Information:**

2

3 **Deviations from preregistration**

4

5 We initially planned to use generalised mixed-effects models with an appropriate link function  
6 for analysis of donation amounts. However, no appropriate link function was identified for the  
7 trimodal distribution and a logit transformation was judged to be more suitable, especially  
8 given that linear mixed-effects models (LMMs) are relatively robust to violations of normality<sup>1</sup>.  
9 Our method is also in line with previous use of the logit<sup>2</sup> or similar arcsine-square root<sup>3</sup>  
10 transformation for data from the dictator game, which our charitable donations measure  
11 approximated. Finally, analysing the logit-transformed values allowed us to use linear models  
12 for effects in each country. For the LMM of donations with the national vs. international factor,  
13 the random intercept of participant, nested within country, lead to convergence issues, as the  
14 participant intercept term did not capture much variance. We removed this term leaving  
15 uncorrelated random country-level intercept and slopes of age and subjective wealth. Our  
16 description of this model also did not explicitly specify controlling for wealth, as we specified  
17 for the model predicting total donations (regardless of national vs. international). Adding this  
18 control significantly improved the model in both subsamples and results did not change (see  
19 Supplementary Results below) so we report the results controlling for subjective wealth in the  
20 main text.

21

22 We originally specified that the factor analysis would be across all participants (and not  
23 subsamples). However, the final sample size with all measures for the factor analysis was  
24 substantial and allowed us to analyse the two subsamples separately. Results showed almost  
25 identical factor structures and loadings, thus demonstrating robustness of our findings. For  
26 correlations and structural equation models using factor scores, and for patterns in each  
27 country, we considered amounts given to national and international charities separately, rather  
28 than looking at the total amount donated and bias toward national charities. This was to make  
29 results easier to interpret, given the relationship between age and donations was in opposite  
30 directions for national and international donations. For the same reason, in the LMM with  
31 country-level variables, we added three-way interactions between the country-level variable,  
32 age and charity location (national vs. international). Our preregistration also stated we would  
33 test whether the individual difference factors “mediated” the effect of age on prosocial  
34 behaviour, but we recognise there are issues around interpreting results from cross-sectional  
35 data as showing causal mediation<sup>4-7</sup>. While the temporal structure of the variables in our

36 structural equation models result in unidirectional paths in all cases (see Methods; Fig. S6),  
37 we do not use the term “mediate” when discussing the indirect effects. Finally, due to the large  
38 sample size and power, we used a  $p < 0.01$  Bonferroni-corrected threshold, rather than a  
39 familywise detection rate correction with  $p < 0.05$  for the analysis of traits. This was applied in  
40 each subsample for each group of tests (correlations and each category of path in the  
41 structural equation models). For tests of differences between correlations, not included in the  
42 preregistration, we made this more stringent at  $p < 0.0001$  Bonferroni-corrected.

43

#### 44 **Test-retest reliability analysis**

45

46 A sample of 448 participants in the UK completed the measures at two time points, one month  
47 apart. Data from the first time point is included in the main analysis. We examined test-retest  
48 reliability of the two prosocial measures, distancing and overall donations, as well as the 19  
49 individual difference measures through the intraclass correlation coefficient (ICC) between  
50 responses at time 1 and time 2. We calculated ICC using the `icc` function from the `irr` package<sup>8</sup>  
51 and running a two-way model estimating agreement between time points. Unlike a Pearson’s  
52 or Spearman’s correlation, this measures whether absolute scores remain the same, as well  
53 as the relationship or ranking between participants, and includes random effects of participant  
54 and time point, so is recommended for test-retest reliability<sup>9</sup>.

55

#### 56 **Factor correlations and structural equation models**

57

58 For each factor, we calculated the Pearson’s correlation with age, distancing, national  
59 donations, and international donations. This measure was used despite deviations from  
60 normality for some variables due to the large sample and stringent correction to significance  
61 levels: we applied a Bonferroni correction with a  $p < 0.01$  threshold. We then used structural  
62 equation models implemented in the `lavaan` package<sup>81</sup> to test potential statistical indirect  
63 effects of age on distancing, national donations, and international donations via the trait  
64 factors. These models allow us to bring the three measures of age, traits, and prosocial  
65 behaviour together in a single analysis, estimating the direct and indirect associations  
66 concurrently and enabling the traits to be both predicted by age and predict prosocial  
67 behaviour. As the independent variables of interest in our models were age and socio-  
68 emotional traits, these cannot be experimentally manipulated. However, the directions of  
69 effects in our models are based on a logical temporal structure from the fact that no other  
70 variable can affect chronological age. Traits that are generally stable across months (see

71 Table S7 for test-retest reliability over one month) and existed before the pandemic precede  
72 the prosocial behaviours, which applied specifically to the recent pandemic context. We ran a  
73 structural equation model for each of the three prosocial outcomes: distancing, national  
74 donations, and international donations. Each had a direct path from age to the prosocial  
75 measure, indirect paths via each trait factor, and the relevant control variable predicting  
76 prosocial behaviour (perceived risk for distancing and subjective wealth for both types of  
77 donations). Donation amounts were logit transformed and all variables were z-scored as in  
78 the main models. Covariances between the trait factors were also included in the model. For  
79 each path, we extracted the standardised coefficients and associated  $p$  values, and Bonferroni  
80 corrected the  $p$  values across all paths for all three structural equation models in each  
81 subsample.

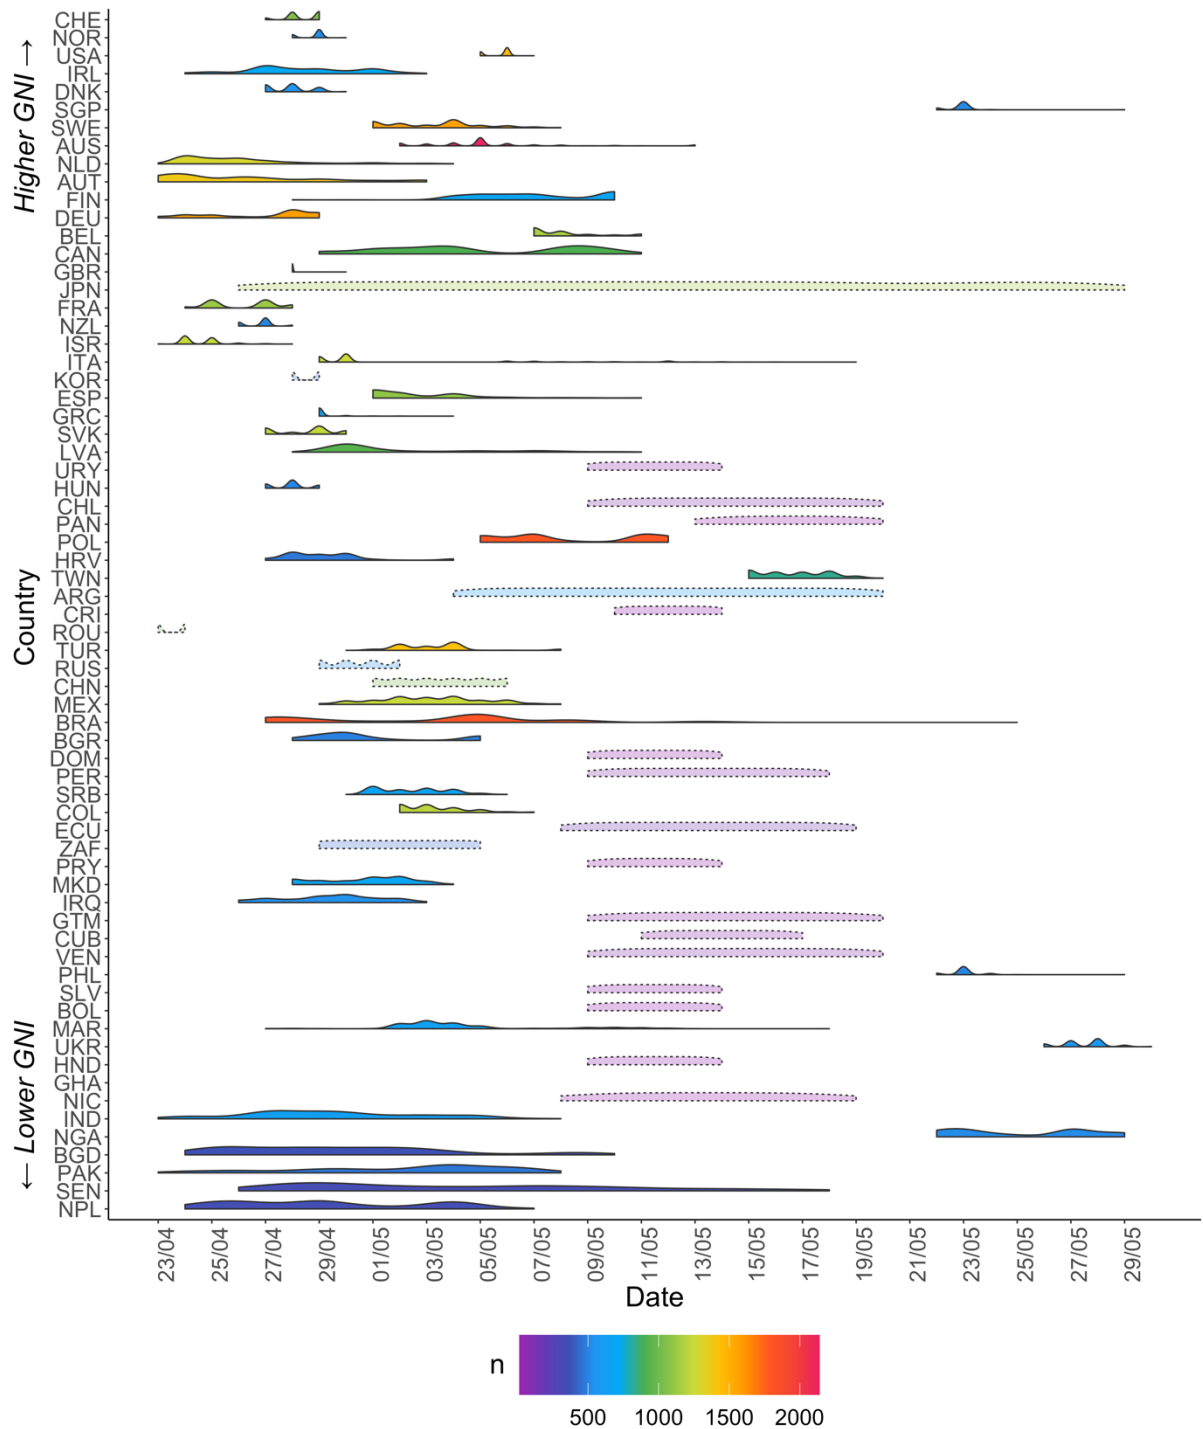

82 **Fig. S1. Data collection periods in each country.** Distributions represent the date  
 83 participants completed the survey. Distributions are relative to the country's sample and the  
 84 colour shows the sample size. Countries with faded distributions and dashed outlines were  
 85 missing the date of survey completion for each participant so distributions are just from the  
 86 start date to the end date of data collection. Countries are labelled with their ISO3 code and  
 87 sorted by gross national income (GNI) from richest to poorest. Exact GNI was not available  
 88 for three countries so they are included at the lowest point of their GNI income group (Taiwan  
 89 – TWN: high income; Venezuela – VEN: upper-middle income; Cuba – CUB: upper-middle  
 90 income).  
 91

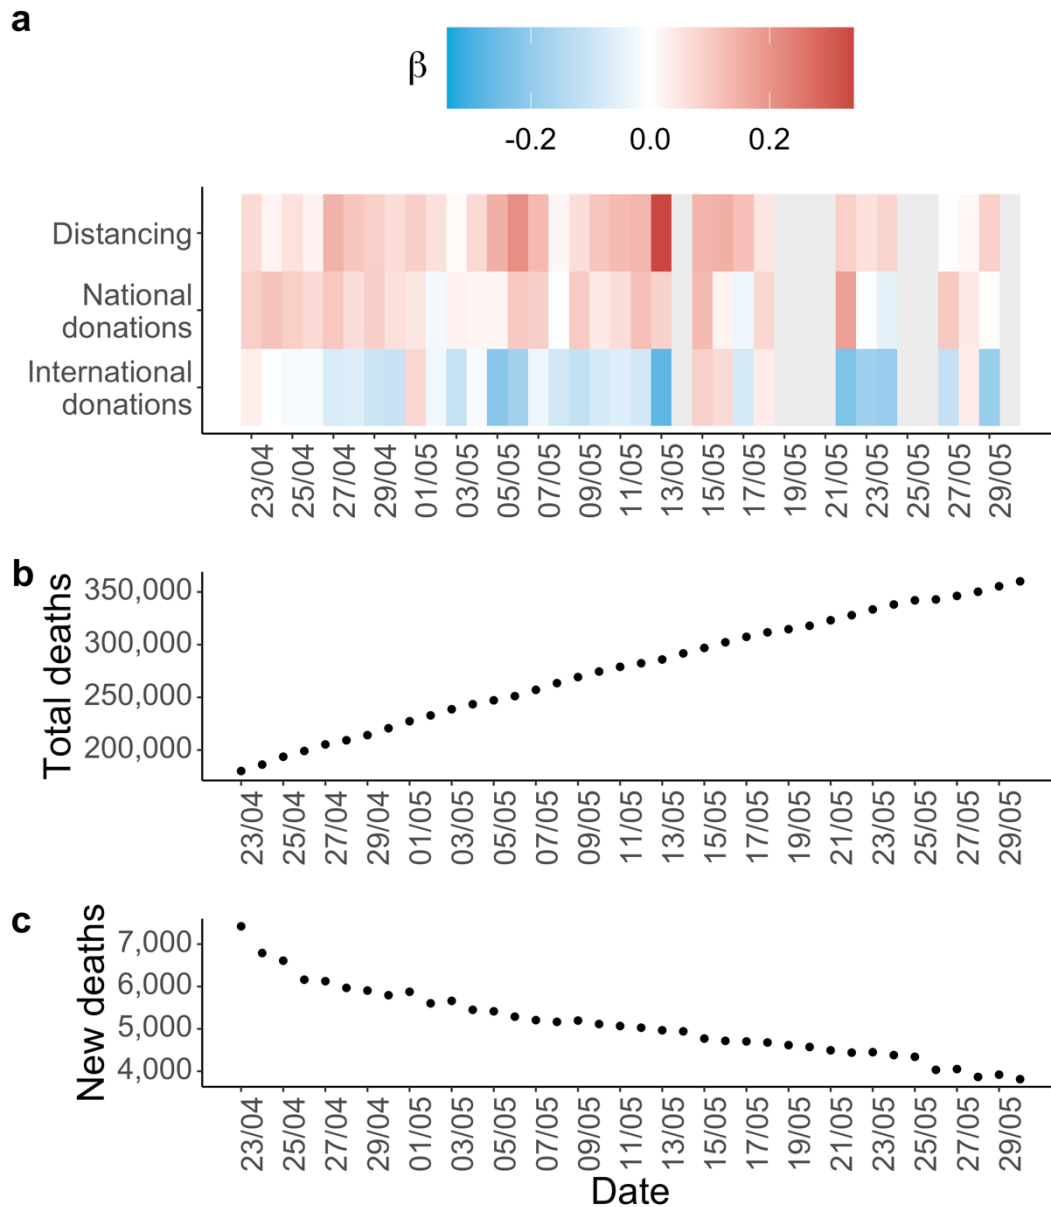

92  
 93 **Fig. S2. Age effects on prosocial behaviour and COVID-19 deaths over the period of**  
 94 **data collection.** (a) Standardised regression  $\beta$ s for the effect of age on each prosocial  
 95 outcome measure were calculated on each day of data collection that more than 100 people  
 96 completed the survey on.  $\beta$ s do not show a systematic relationship with time, including relative  
 97 to when countries of differing wealth collected data (see Fig. S1). (b) The total number of  
 98 deaths from COVID-19 rose steadily over the time data were being collected. (c) The rate of  
 99 new deaths each day (7-day rolling average) from COVID-19 worldwide fell over the period of  
 100 data collection.  
 101

102 **Supplementary Results**

103

104 ***Results are the same when excluding the 10% of data available for preliminary analysis***

105

106 Before our preregistration, we received a randomly selected 10% of the overall dataset and  
107 ran preliminary analyses relevant to the preregistered hypotheses. These data were included  
108 in the full dataset to increase power, particularly for country-level effects. Participants whose  
109 data were in this 10% were divided evenly between the two subsamples. We also showed that  
110 the key findings are the same when excluding these participants (see Table S2).

111

112 ***Age effects are not driven by differences between countries in the range of ages in the***  
113 ***population***

114

115 Results in the main text are reported from analyses using participants' raw age as predictors.  
116 We also tested whether key findings remained the same when using participants' age adjusted  
117 to be a proportion of the life expectancy in the relevant country. When participants reported  
118 their gender as male or female, the life expectancy for their gender was used. A value of 1 on  
119 this scale represents an age equal to the average life expectancy. If participants reported  
120 having a non-binary gender or did not report their gender, the life expectancy for the whole  
121 population in the country was used. All results reported in the main text for raw age were the  
122 same when using age adjusted for life expectancy (Table S3). Adjusted age predicted higher  
123 distancing scores, larger overall donations, and more national bias in giving.

124  
125

**Table S1.**  
Results from linear mixed-effects models predicting distancing and hypothetical charitable donations (total and by charity location)

| Distancing                  | Subsample 1 |        |       |          |          |          | Subsample 2 |        |       |          |          |          |
|-----------------------------|-------------|--------|-------|----------|----------|----------|-------------|--------|-------|----------|----------|----------|
|                             | $\beta$     | CI low | CI up | <i>t</i> | df       | <i>p</i> | $\beta$     | CI low | CI up | <i>t</i> | df       | <i>p</i> |
| Intercept                   | -0.11       | -0.18  | -0.04 | -3.13    | 72.77    | 0.003    | -0.09       | -0.16  | -0.02 | -2.61    | 71.87    | 0.01     |
| Gender (F > M)              | 0.27        | 0.25   | 0.30  | 21.49    | 23058.13 | <0.001   | 0.28        | 0.25   | 0.30  | 21.62    | 23038.14 | <0.001   |
| Perceived risk              | 0.02        | 0.00   | 0.05  | 1.83     | 53.13    | 0.07     | 0.02        | 0.00   | 0.05  | 1.69     | 50.88    | 0.10     |
| Age                         | 0.10        | 0.07   | 0.13  | 6.29     | 56.27    | <0.001   | 0.10        | 0.07   | 0.13  | 6.74     | 50.98    | <0.001   |
| <b>Total donations</b>      |             |        |       |          |          |          |             |        |       |          |          |          |
| Intercept                   | -0.10       | -0.18  | -0.03 | -2.76    | 74.88    | 0.01     | -0.08       | -0.15  | 0.00  | -2.06    | 75.88    | 0.04     |
| Gender (F > M)              | 0.14        | 0.12   | 0.17  | 11.34    | 23021.19 | <0.001   | 0.16        | 0.13   | 0.18  | 12.36    | 23042.42 | <0.001   |
| Subjective wealth           | -0.08       | -0.10  | -0.06 | -8.78    | 39.46    | <0.001   | -0.08       | -0.11  | -0.06 | -6.76    | 52.41    | <0.001   |
| Age (linear)                | 0.04        | 0.02   | 0.06  | 4.29     | 55.68    | <0.001   | 0.05        | 0.03   | 0.07  | 5.00     | 46.19    | <0.001   |
| Age (quadratic)             | 0.06        | 0.04   | 0.07  | 8.56     | 6780.73  | <0.001   | 0.04        | 0.02   | 0.05  | 5.71     | 6244.72  | <0.001   |
| <b>Donations by charity</b> |             |        |       |          |          |          |             |        |       |          |          |          |
| Intercept                   | 0.29        | 0.24   | 0.34  | 11.59    | 74.38    | <0.001   | 0.30        | 0.25   | 0.35  | 11.57    | 74.63    | <0.001   |
| Gender (F > M)              | 0.10        | 0.08   | 0.12  | 11.60    | 45359.41 | <0.001   | 0.12        | 0.10   | 0.13  | 13.20    | 45684.43 | <0.001   |
| Subjective wealth           | -0.05       | -0.06  | -0.04 | -8.38    | 48.54    | <0.001   | -0.05       | -0.07  | -0.04 | -6.30    | 52.12    | <0.001   |
| Age                         | 0.08        | 0.06   | 0.09  | 8.09     | 72.78    | <0.001   | 0.07        | 0.05   | 0.09  | 7.65     | 67.90    | <0.001   |
| Charity (I > N)             | -0.66       | -0.67  | -0.64 | -76.60   | 45798.29 | <0.001   | -0.66       | -0.68  | -0.64 | -77.00   | 45827.23 | <0.001   |
| Age * Charity               | -0.12       | -0.14  | -0.11 | -14.28   | 45798.74 | <0.001   | -0.11       | -0.12  | -0.09 | -12.63   | 45827.79 | <0.001   |

126 Note. CI low / up: 95% confidence interval lower / upper, F: female, M: male, I: international charity, N: national charity.



127  
128

**Table S2.**  
Results from linear mixed-effects models excluding the 10% of participants in preliminary analysis

| <b>Distancing</b>           | <b>Subsample 1</b> |        |       |          |          |          | <b>Subsample 2</b> |        |       |          |          |          |
|-----------------------------|--------------------|--------|-------|----------|----------|----------|--------------------|--------|-------|----------|----------|----------|
|                             | $\beta$            | CI low | CI up | <i>t</i> | df       | <i>p</i> | $\beta$            | CI low | CI up | <i>t</i> | df       | <i>p</i> |
| Intercept                   | -0.11              | -0.18  | -0.03 | -2.91    | 72.39    | 0.005    | -0.09              | -0.16  | -0.02 | -2.39    | 71.64    | 0.02     |
| Gender (F > M)              | 0.27               | 0.24   | 0.30  | 20.07    | 20776.84 | <0.001   | 0.27               | 0.25   | 0.30  | 20.21    | 20770.87 | <0.001   |
| Perceived risk              | 0.02               | 0.00   | 0.05  | 1.69     | 52.75    | 0.10     | 0.03               | 0.00   | 0.05  | 2.11     | 48.80    | 0.04     |
| Age                         | 0.10               | 0.07   | 0.14  | 6.26     | 54.24    | <0.001   | 0.10               | 0.07   | 0.13  | 6.85     | 49.86    | <0.001   |
| <b>Total donations</b>      |                    |        |       |          |          |          |                    |        |       |          |          |          |
| Intercept                   | -0.10              | -0.17  | -0.03 | -2.62    | 76.03    | 0.01     | -0.08              | -0.16  | -0.01 | -2.15    | 75.36    | 0.03     |
| Gender (F > M)              | 0.14               | 0.11   | 0.17  | 10.44    | 20749.65 | <0.001   | 0.15               | 0.13   | 0.18  | 11.60    | 20756.26 | <0.001   |
| Subjective wealth           | -0.08              | -0.10  | -0.06 | -8.62    | 37.83    | <0.001   | -0.08              | -0.11  | -0.06 | -6.73    | 50.62    | <0.001   |
| Age (linear)                | 0.04               | 0.02   | 0.06  | 3.95     | 58.52    | <0.001   | 0.04               | 0.03   | 0.06  | 4.55     | 44.83    | <0.001   |
| Age (quadratic)             | 0.06               | 0.04   | 0.07  | 8.10     | 6399.49  | <0.001   | 0.04               | 0.03   | 0.05  | 5.87     | 5488.07  | <0.001   |
| <b>Donations by charity</b> |                    |        |       |          |          |          |                    |        |       |          |          |          |
| Intercept                   | 0.29               | 0.24   | 0.34  | 11.68    | 75.88    | <0.001   | 0.29               | 0.24   | 0.35  | 11.15    | 74.15    | <0.001   |
| Gender (F > M)              | 0.10               | 0.08   | 0.12  | 10.67    | 40741.74 | <0.001   | 0.11               | 0.10   | 0.13  | 12.41    | 41095.13 | <0.001   |
| Subjective wealth           | -0.05              | -0.07  | -0.04 | -8.42    | 47.10    | <0.001   | -0.05              | -0.07  | -0.04 | -6.35    | 49.67    | <0.001   |
| Age                         | 0.07               | 0.06   | 0.09  | 7.92     | 76.77    | <0.001   | 0.07               | 0.05   | 0.09  | 7.10     | 66.89    | <0.001   |
| Charity (I > N)             | -0.66              | -0.67  | -0.64 | -72.72   | 41243.08 | <0.001   | -0.65              | -0.67  | -0.64 | -72.60   | 41258.32 | <0.001   |
| Age * Charity               | -0.12              | -0.14  | -0.11 | -13.68   | 41243.59 | <0.001   | -0.11              | -0.12  | -0.09 | -11.75   | 41258.94 | <0.001   |

129 Note. CI low / up: 95% confidence interval lower / upper, F: female, M: male, I: international charity, N: national charity.

130  
131

**Table S3.**  
Results from linear mixed-effects models using age adjusted to a proportion of the participants' country life expectancy

|                             | Subsample 1 |        |       |          |          |          | Subsample 2 |        |       |          |          |          |
|-----------------------------|-------------|--------|-------|----------|----------|----------|-------------|--------|-------|----------|----------|----------|
|                             | beta        | CI low | CI up | <i>t</i> | df       | <i>p</i> | beta        | CI low | CI up | <i>t</i> | df       | <i>p</i> |
| <b>Distancing</b>           |             |        |       |          |          |          |             |        |       |          |          |          |
| Intercept                   | -0.11       | -0.18  | -0.05 | -3.27    | 72.68    | 0.002    | -0.1        | -0.16  | -0.03 | -2.79    | 71.83    | 0.007    |
| Gender (F > M)              | 0.27        | 0.25   | 0.30  | 21.51    | 23057.37 | <0.001   | 0.28        | 0.25   | 0.30  | 21.63    | 23037.49 | <0.001   |
| Perceived risk              | 0.02        | 0.00   | 0.05  | 1.83     | 53.18    | 0.07     | 0.02        | 0.00   | 0.05  | 1.71     | 51.05    | 0.09     |
| Adjusted age                | 0.10        | 0.07   | 0.13  | 6.23     | 57.38    | <0.001   | 0.10        | 0.07   | 0.13  | 6.73     | 53.19    | <0.001   |
| <b>Total donations</b>      |             |        |       |          |          |          |             |        |       |          |          |          |
| Intercept                   | -0.10       | -0.17  | -0.03 | -2.65    | 74.78    | 0.01     | -0.08       | -0.15  | 0.00  | -2.04    | 76.02    | 0.05     |
| Gender (F > M)              | 0.14        | 0.12   | 0.17  | 11.32    | 23049.57 | <0.001   | 0.16        | 0.13   | 0.18  | 12.35    | 23060.32 | <0.001   |
| Subjective wealth           | -0.08       | -0.10  | -0.06 | -8.74    | 39.39    | <0.001   | -0.08       | -0.11  | -0.06 | -6.72    | 52.45    | <0.001   |
| Adj. age (linear)           | 0.04        | 0.02   | 0.06  | 3.96     | 50.85    | <0.001   | 0.05        | 0.03   | 0.07  | 4.73     | 43.91    | <0.001   |
| Adj. age (quadratic)        | 0.05        | 0.04   | 0.06  | 7.59     | 8432.62  | <0.001   | 0.03        | 0.02   | 0.05  | 5.12     | 7849.33  | <0.001   |
| <b>Donations by charity</b> |             |        |       |          |          |          |             |        |       |          |          |          |
| Intercept                   | 0.29        | 0.24   | 0.34  | 11.62    | 74.97    | <0.001   | 0.3         | 0.25   | 0.35  | 11.67    | 75.14    | <0.001   |
| Gender (F > M)              | 0.10        | 0.08   | 0.12  | 11.61    | 45350.16 | <0.001   | 0.12        | 0.10   | 0.13  | 13.21    | 45682.61 | <0.001   |
| Subjective wealth           | -0.05       | -0.06  | -0.04 | -8.38    | 48.54    | <0.001   | -0.05       | -0.07  | -0.04 | -6.30    | 52.13    | <0.001   |
| Adjusted age                | 0.08        | 0.07   | 0.10  | 9.26     | 80.10    | <0.001   | 0.08        | 0.06   | 0.10  | 8.70     | 72.62    | <0.001   |
| Charity (I > N)             | -0.66       | -0.67  | -0.64 | -76.65   | 45796.52 | <0.001   | -0.66       | -0.68  | -0.64 | -77.05   | 45826.26 | <0.001   |
| Adj. age * Charity          | -0.14       | -0.16  | -0.12 | -16.20   | 45797.02 | <0.001   | -0.12       | -0.14  | -0.11 | -14.52   | 45827.00 | <0.001   |

Note. CI low / up: 95% confidence interval lower / upper, F: female, M: male, Adj.: Adjusted, I: international charity, N: national charity.

132  
133

134 **Table S4.**

135 Results from linear mixed-effects models of distancing controlling for participants' self-reported physical health condition

| <b>Distancing</b> | <b>Subsample 1</b> |        |       |          |          |          | <b>Subsample 2</b> |        |       |          |          |          |
|-------------------|--------------------|--------|-------|----------|----------|----------|--------------------|--------|-------|----------|----------|----------|
|                   | beta               | CI low | CI up | <i>t</i> | df       | <i>p</i> | beta               | CI low | CI up | <i>t</i> | df       | <i>p</i> |
| Intercept         | -0.12              | -0.18  | -0.05 | -3.38    | 73.02    | 0.001    | -0.1               | -0.16  | -0.03 | -2.82    | 72.11    | 0.006    |
| Gender (F > M)    | 0.28               | 0.25   | 0.30  | 21.74    | 22964.50 | <0.001   | 0.28               | 0.25   | 0.30  | 21.75    | 22919.86 | <0.001   |
| Perceived risk    | 0.03               | 0.00   | 0.05  | 2.22     | 52.83    | 0.03     | 0.02               | 0.00   | 0.05  | 2.10     | 49.46    | 0.04     |
| Health condition  | 0.06               | 0.03   | 0.08  | 4.67     | 49.95    | <0.001   | 0.05               | 0.02   | 0.07  | 3.98     | 54.69    | <0.001   |
| Age               | 0.10               | 0.07   | 0.14  | 6.58     | 55.88    | <0.001   | 0.10               | 0.07   | 0.13  | 6.96     | 50.47    | <0.001   |

136 Note. CI low / up: 95% confidence interval lower / upper, F: female, M: male.

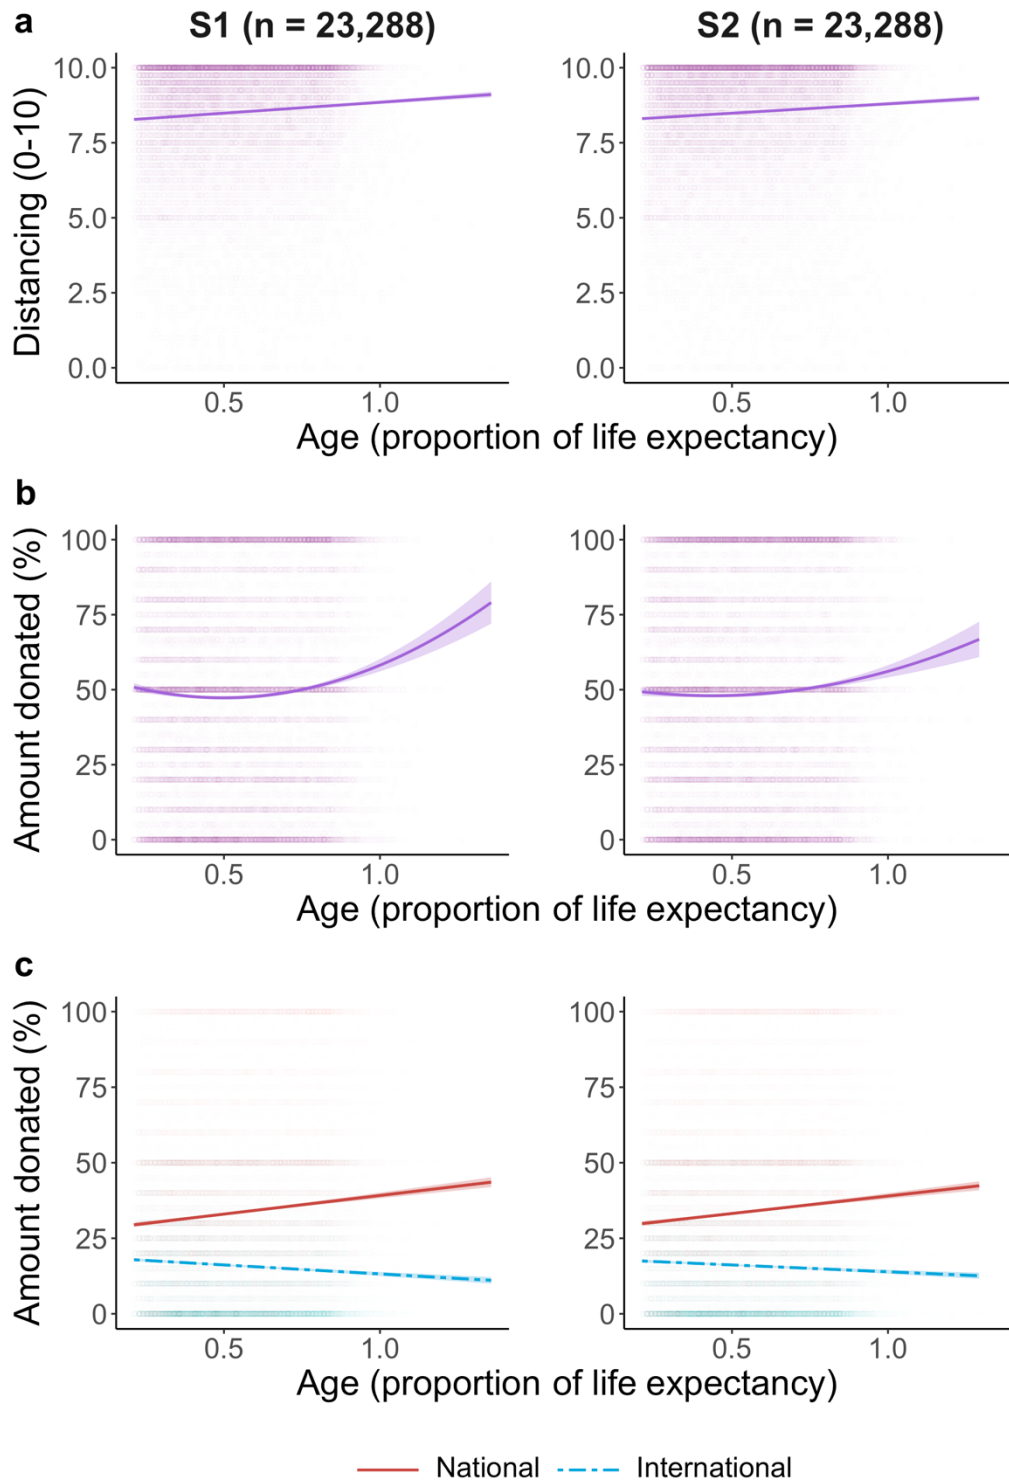

137 **Fig. S3. Age adjusted for life expectancy is associated with prosocial behaviour.** In both  
 138 subsample 1 (left) and subsample 2 (right), age as the proportion of life expectancy in the  
 139 participants' country predicted greater prosocial behaviour. On this scale, 1 represents an age  
 140 equal to the average life expectancy. **(a)** Older age predicted higher rates of distancing and  
 141 **(b)** hypothetical charitable donations when summed across both charities. The relationship  
 142 between age and total donations is quadratic. **(c)** Age was positively associated with donations  
 143 to a national charity but negatively associated with donations to an international charity. Lines  
 144 show fitted linear models, shaded areas show 95% confidence intervals.

145 ***The relationship between age and donations to national & international charities is***  
146 ***robust with or without controlling for subjective wealth***

147

148 As described in the deviations from the preregistration, we included a fixed and a random  
149 effect of subjective wealth as a control variable in the model predicting donations to national  
150 and international charities separately. For both subsamples, this significantly improved the  
151 model fit ( $\chi^2(2)$  S1 | S2: 177 | 225,  $p < 0.001$  |  $p < 0.001$ ) so the results from this model are reported  
152 within the text. Without controlling for subjective wealth, the key predictors remained  
153 significant such that older people gave more overall ( $\beta = 0.08$  |  $0.07$ ,  $p < 0.001$  |  $p < 0.001$ ) and this  
154 relationship was significantly less positive (in fact negative) for international, compared to  
155 national, charities (interaction  $\beta = -0.12$  |  $-0.11$ ,  $p < 0.001$  |  $p < 0.001$ ).

156

157 ***Age is associated with increased donations and national bias in giving when***  
158 ***controlling for objective wealth***

159

160 In a subset of participants ( $n = 2,624$ , 5 countries) where we had objective wealth data (monthly  
161 income, see Methods) we ran an additional control analysis to assess whether the relationship  
162 between age and national/international donations remained. Due to the smaller sample, we  
163 analysed the data as one group and applied a  $p < 0.05$  threshold. As reported in the main text,  
164 after controlling for objective wealth, age was still positively associated with donations ( $\beta = 0.11$ ,  
165  $p = 0.02$ ; Table S5 & Fig. S4) and greater bias towards national charities (interaction  $\beta = -0.22$ ,  
166  $p < 0.001$ ). The effects of charity location (international vs. national  $d = -0.78$ ,  $p < 0.001$ ) and  
167 gender (female vs. male  $d = 0.14$ ,  $p < 0.001$ ) also remained significant and had sizes  
168 comparable to the full sample. Unlike subjective wealth, objective wealth did not significantly  
169 predict donations ( $p = 0.45$ ).

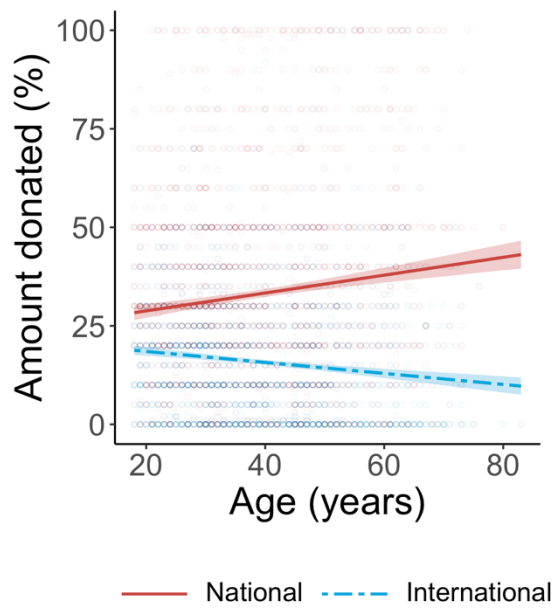

171 **Fig. S4.** The relationship between age and donations in the participants with objective wealth  
 172 data. Data on objective wealth (self-reported monthly income) was available from 2624  
 173 participants in 5 countries (UK, Singapore, Nigeria, the Philippines, and Ukraine). Age was  
 174 associated with increased donations to the national charity but decreased donations to the  
 175 international charity, as in the full dataset. Lines show fitted linear models, shaded areas show  
 176 95% confidence intervals.

177  
 178  
 179  
 180  
 181  
 182  
 183

184 **Table S5.**

185 Results from linear mixed-effects model predicting donations by charity controlling for  
 186 objective wealth (n=2624, 5 countries)

|                  | $\beta$ | CI low | CI up | <i>t</i> | df      | <i>p</i> |
|------------------|---------|--------|-------|----------|---------|----------|
| Intercept        | 0.28    | 0.13   | 0.44  | 3.51     | 4.41    | 0.02     |
| Gender (F > M)   | 0.13    | 0.08   | 0.18  | 4.98     | 5199.67 | <0.001   |
| Objective wealth | 0.02    | -0.03  | 0.06  | 0.83     | 4.19    | 0.45     |
| Age              | 0.11    | 0.04   | 0.18  | 3.10     | 5.51    | 0.02     |
| Charity (I > N)  | -0.71   | -0.76  | -0.66 | -28.20   | 5220.30 | <0.001   |
| Age * Charity    | -0.22   | -0.27  | -0.17 | -8.65    | 5220.30 | <0.001   |

187 Note. CI low / up: 95% confidence interval lower / upper, F: female, M: male, I: international  
 188 charity, N: national charity.

189  
190

**Table S6.**  
Results from linear mixed-effects models including country-level variables

|                             | Subsample 1 |        |       |          |          |          | Subsample 2 |        |       |          |          |          |
|-----------------------------|-------------|--------|-------|----------|----------|----------|-------------|--------|-------|----------|----------|----------|
|                             | $\beta$     | CI low | CI up | <i>t</i> | df       | <i>p</i> | $\beta$     | CI low | CI up | <i>t</i> | df       | <i>p</i> |
| <b>Distancing</b>           |             |        |       |          |          |          |             |        |       |          |          |          |
| Intercept                   | -0.14       | -0.21  | -0.06 | -3.49    | 42.47    | 0.001    | -0.13       | -0.20  | -0.05 | -3.41    | 42.74    | 0.001    |
| Gender (F > M)              | 0.29        | 0.26   | 0.31  | 20.33    | 19168.04 | <0.001   | 0.29        | 0.26   | 0.31  | 20.34    | 19167.83 | <0.001   |
| Perceived risk              | 0.03        | 0.02   | 0.04  | 4.01     | 19151.64 | <0.001   | 0.03        | 0.01   | 0.04  | 3.69     | 19112.64 | <0.001   |
| Age                         | 0.12        | 0.09   | 0.15  | 7.01     | 33.24    | <0.001   | 0.11        | 0.07   | 0.14  | 6.00     | 28.99    | <0.001   |
| Deaths - DTW                | -0.04       | -0.07  | 0.00  | -2.01    | 756.29   | 0.04     | -0.05       | -0.08  | -0.01 | -2.61    | 674.84   | 0.009    |
| Deaths - DRW                | -0.02       | -0.04  | 0.01  | -1.50    | 4560.54  | 0.13     | -0.03       | -0.05  | 0.00  | -2.34    | 3900.96  | 0.02     |
| Deaths - DTC                | 0.09        | 0.01   | 0.17  | 2.19     | 46.96    | 0.03     | 0.09        | 0.02   | 0.17  | 2.47     | 47.25    | 0.02     |
| Deaths - DRC                | 0.03        | -0.02  | 0.08  | 1.23     | 526.61   | 0.22     | 0.06        | 0.01   | 0.11  | 2.26     | 449.79   | 0.02     |
| Country wealth              | -0.10       | -0.17  | -0.02 | -2.58    | 40.92    | 0.01     | -0.11       | -0.18  | -0.04 | -2.99    | 41.23    | 0.005    |
| Age * DTW                   | 0.00        | -0.02  | 0.03  | 0.25     | 184.95   | 0.80     | 0.01        | -0.02  | 0.03  | 0.51     | 168.33   | 0.61     |
| Age * DRW                   | 0.01        | -0.02  | 0.03  | 0.47     | 559.95   | 0.64     | 0.02        | 0.00   | 0.04  | 1.62     | 543.37   | 0.11     |
| Age * DTC                   | -0.01       | -0.05  | 0.03  | -0.67    | 39.63    | 0.51     | -0.01       | -0.05  | 0.03  | -0.46    | 35.42    | 0.65     |
| Age * DRC                   | -0.02       | -0.06  | 0.01  | -1.39    | 63.39    | 0.17     | -0.01       | -0.05  | 0.02  | -0.67    | 60.23    | 0.50     |
| Age * CW                    | 0.05        | 0.01   | 0.08  | 2.58     | 36.57    | 0.01     | 0.04        | 0.00   | 0.07  | 1.91     | 32.35    | 0.07     |
| <b>Donations by charity</b> |             |        |       |          |          |          |             |        |       |          |          |          |
| Intercept                   | 0.27        | 0.23   | 0.32  | 11.57    | 45.82    | <0.001   | 0.27        | 0.22   | 0.32  | 10.18    | 44.55    | <0.001   |
| Gender (F > M)              | 0.11        | 0.09   | 0.13  | 11.56    | 37995.17 | <0.001   | 0.12        | 0.11   | 0.14  | 13.04    | 38231.10 | <0.001   |
| Subjective wealth           | -0.06       | -0.07  | -0.04 | -8.03    | 39.34    | <0.001   | -0.05       | -0.07  | -0.04 | -6.35    | 39.38    | <0.001   |
| Age                         | 0.10        | 0.08   | 0.12  | 10.62    | 68.98    | <0.001   | 0.09        | 0.07   | 0.11  | 9.29     | 59.45    | <0.001   |
| Charity (I > N)             | -0.67       | -0.68  | -0.65 | -70.59   | 38426.60 | <0.001   | -0.66       | -0.68  | -0.64 | -70.69   | 38435.12 | <0.001   |
| Deaths - DTW                | -0.03       | -0.06  | -0.01 | -2.70    | 738.26   | 0.007    | -0.04       | -0.07  | -0.02 | -3.64    | 957.46   | <0.001   |
| Deaths - DTC                | 0.00        | -0.05  | 0.04  | -0.20    | 49.61    | 0.84     | 0.01        | -0.05  | 0.06  | 0.26     | 48.71    | 0.80     |
| Deaths - DRC                | 0.04        | 0.00   | 0.07  | 2.22     | 570.46   | 0.03     | 0.04        | 0.01   | 0.08  | 2.39     | 809.75   | 0.02     |

|                     |       |       |       |        |          |        |       |       |       |        |          |        |
|---------------------|-------|-------|-------|--------|----------|--------|-------|-------|-------|--------|----------|--------|
| Country wealth      | -0.18 | -0.22 | -0.13 | -7.64  | 44.19    | <0.001 | -0.17 | -0.22 | -0.12 | -6.54  | 43.61    | <0.001 |
| Age * Charity       | -0.17 | -0.19 | -0.15 | -17.68 | 38426.60 | <0.001 | -0.15 | -0.16 | -0.13 | -15.06 | 38435.12 | <0.001 |
| Age * DTW           | -0.02 | -0.03 | 0.00  | -2.56  | 127.88   | 0.01   | -0.01 | -0.03 | 0.00  | -1.93  | 111.36   | 0.06   |
| Charity * DTW       | 0.05  | 0.04  | 0.07  | 5.69   | 38426.60 | <0.001 | 0.06  | 0.04  | 0.08  | 5.89   | 38435.12 | <0.001 |
| Age * DTC           | 0.00  | -0.03 | 0.02  | -0.41  | 72.84    | 0.68   | -0.01 | -0.03 | 0.01  | -1.23  | 64.61    | 0.22   |
| Charity * DTC       | 0.06  | 0.04  | 0.08  | 5.22   | 38426.60 | <0.001 | 0.04  | 0.02  | 0.06  | 3.99   | 38435.12 | <0.001 |
| Age * DRC           | -0.02 | -0.04 | 0.00  | -1.97  | 87.34    | 0.05   | -0.03 | -0.05 | -0.01 | -2.53  | 75.29    | 0.01   |
| Charity * DRC       | -0.02 | -0.05 | 0.00  | -2.32  | 38426.60 | 0.02   | -0.03 | -0.05 | 0.00  | -2.39  | 38435.12 | 0.02   |
| Age * CW            | 0.02  | 0.00  | 0.04  | 2.50   | 42.14    | 0.02   | 0.02  | 0.00  | 0.04  | 2.31   | 36.73    | 0.03   |
| Charity * CW        | 0.14  | 0.12  | 0.16  | 13.84  | 38426.60 | <0.001 | 0.13  | 0.11  | 0.15  | 12.88  | 38435.12 | <0.001 |
| Age * Charity * DTC | 0.03  | 0.01  | 0.05  | 2.52   | 38426.60 | 0.01   | 0.04  | 0.02  | 0.06  | 3.40   | 38435.12 | <0.001 |
| Age * Charity * DRC | 0.05  | 0.03  | 0.07  | 4.74   | 38426.60 | <0.001 | 0.06  | 0.04  | 0.08  | 5.42   | 38435.12 | <0.001 |

191 Note. CI low / up: 95% confidence interval lower / upper, F: female, M: male, DTW: death total worldwide, DTC: death total in country, DRC:  
192 death rate in country, CW: country wealth (gross national income per capita), I: international charity, N: national charity. The effect of death rate  
193 worldwide and any interactions including this term did not significantly improve the model fit.



194 ***COVID-19 severity and country-level wealth predict total donations and national bias in***  
195 ***giving***

196

197 In addition to the three-way interactions between age, charity location and COVID-19 deaths  
198 predicting donations reported in the main text, the model also showed significant two-way  
199 interactions and main effects (Table S6). Two-way interactions between COVID-19 severity  
200 and charity location showed that higher death totals, both in the participants' country ( $\beta=0.06$   
201  $\mid 0.04$ ,  $ps<0.001$ ) and worldwide ( $\beta=0.05 \mid 0.06$ ,  $ps<0.001$ ), were associated with reduced  
202 national bias. Total deaths worldwide also showed a significant negative effect on overall  
203 donations ( $\beta=-0.03 \mid -0.04$ ,  $p=0.007 \mid <0.001$ ; Table S6). Participants in wealthier countries  
204 kept more money for themselves ( $\beta=-0.18 \mid -0.17$ ,  $ps<0.001$ ). Increased donations in less  
205 wealthy countries were predominantly towards the national charity, leading to greater national  
206 bias (interaction  $\beta=0.14 \mid 0.13$ ,  $ps<0.001$ ).

207 ***Most individual difference measures remain stable over time***

208

209 For most of the individual differences measured, intraclass correlation coefficients (ICCs)  
210 revealed good reliability (ICC > 0.70). The eight measures with lower ICCs (0.34 – 0.67) were  
211 single-item measures, seven of which were the Morality as Cooperation items (see Table S7).

212

213 **Table S7.**

214 Results from test-retest reliability analysis (n=448)

| Measure               | ICC  | Number of items |
|-----------------------|------|-----------------|
| Collective narcissism | 0.87 | 3               |
| MaC – deference       | 0.50 | 1               |
| MaC – fairness        | 0.34 | 1               |
| MaC – family          | 0.37 | 1               |
| MaC – group           | 0.42 | 1               |
| MaC – heroism         | 0.39 | 1               |
| MaC – property        | 0.47 | 1               |
| MaC – reciprocity     | 0.44 | 1               |
| Moral circle          | 0.67 | 1               |
| Moral identity        | 0.85 | 10              |
| Narcissism            | 0.84 | 6               |
| National identity     | 0.92 | 2               |
| Open-mindedness       | 0.76 | 6               |
| Optimism              | 0.86 | 2               |
| Political ideology    | 0.82 | 1               |
| Self-control          | 0.88 | 4               |
| Self-esteem           | 0.77 | 1               |
| Social belonging      | 0.90 | 4               |
| Wellbeing             | 0.88 | 2               |

215 Note. ICC: Intraclass correlation coefficient, MaC: Morality as Cooperation.

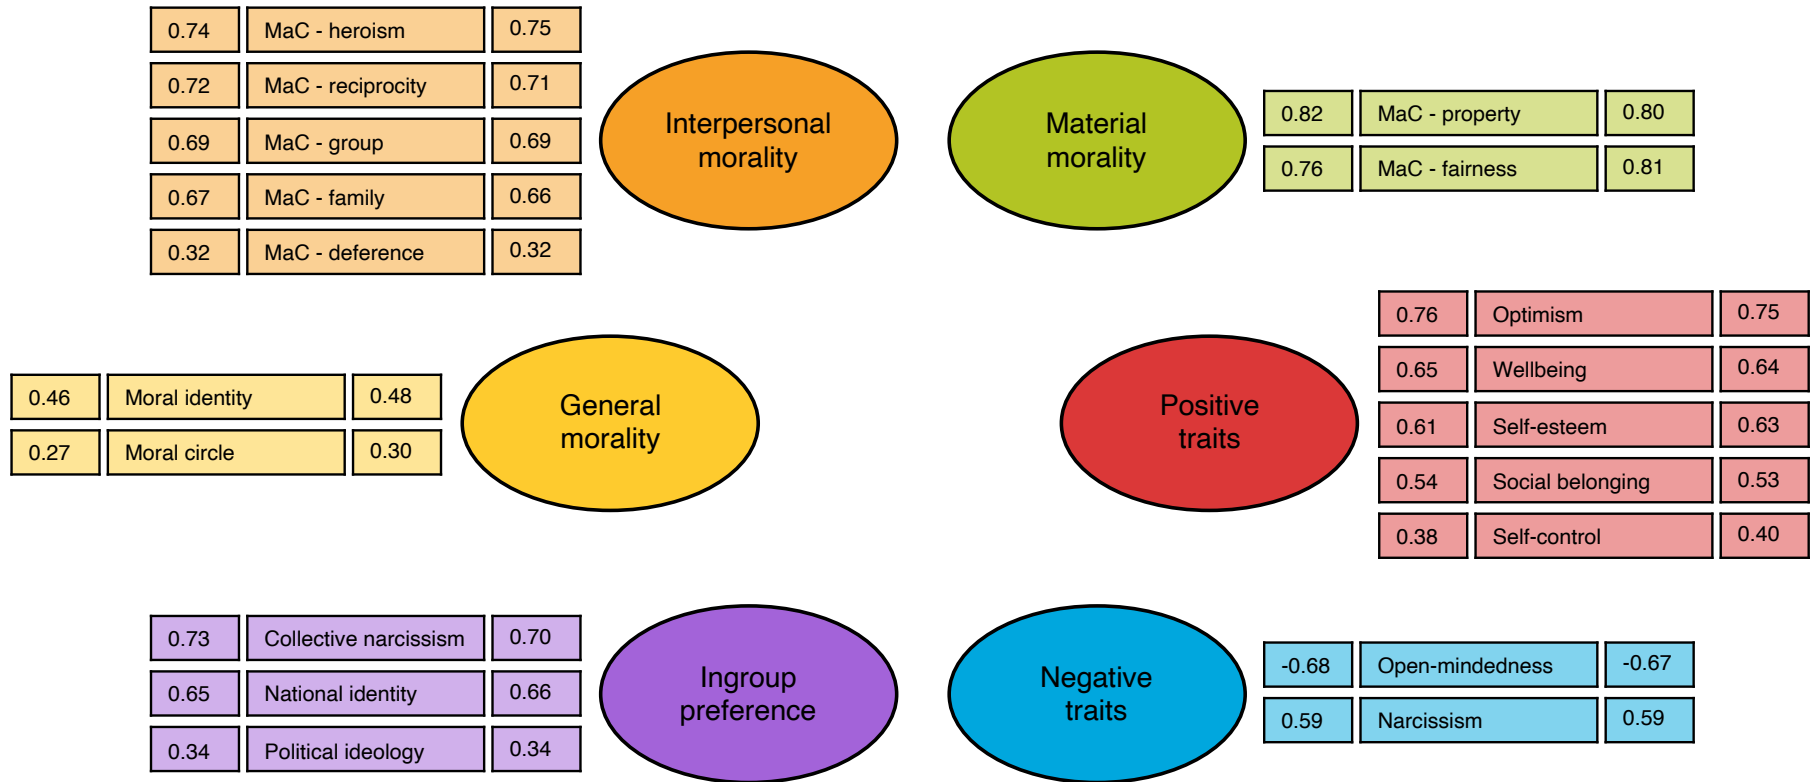

216 **Fig. S5. Factor analysis of individual difference measures.** Loadings of each measure are provided for subsample 1 on the left and subsample  
 217 2 on the right. Only loadings > 0.3 are reported, with the exception of moral circle in subsample 1 (see Methods). Note. MaC: Morality as  
 218 Cooperation.

219 ***Individual difference measures correlate with age and prosocial behaviours***

220

221 To test the relevance of the individual different factors for age-related changes in prosocial  
222 behaviour, we calculated correlations of the factor scores with age and the prosocial measures  
223 (Table S8 and see Results). We next tested whether there were differences in the strength of  
224 correlations between the prosocial measures for each factor. As this analysis was exploratory,  
225 we only report differences significant at  $p < 0.0001$  Bonferroni-corrected. For positive traits,  
226 negative traits, and interpersonal morality, these comparisons showed significant differences  
227 in the absolute size of the correlations such that distancing > national donations > international  
228 donations (Table S8). For example, positive traits showed a correlation of  $r = 0.20$  |  $0.19$  with  
229 distancing,  $r = 0.16$  |  $0.15$  with national donations, and  $r = 0.07$  |  $0.08$  with international  
230 donations. The pattern was similar for interpersonal morality. Negative traits showed a  
231 correlation of  $r = -0.25$  |  $-0.24$  with distancing,  $-0.13$  |  $-0.14$  with national donations, and  $-0.05$   
232 |  $-0.05$  with international donations. General morality was more strongly related to distancing  
233 ( $r = 0.26$  |  $0.27$ ) but similarly related to both types of donations (national  $r = 0.15$  |  $0.15$ ;  
234 international  $r = 0.15$  |  $0.15$ ). In contrast, ingroup preference was positively associated with  
235 national donations ( $r = 0.11$  |  $0.09$ ) but as expected, negatively associated with international  
236 donations ( $r = -0.12$  |  $-0.11$ ), creating a significant difference between these two correlations.

237  
238  
239

**Table S8.**

Correlations of factor scores with age, distancing, donations to national charities, and donations to international charities

|                    | Age    |        | Distancing |        | † | Nat. donations |        | ‡ | Intl. donations |        |
|--------------------|--------|--------|------------|--------|---|----------------|--------|---|-----------------|--------|
|                    | S1     | S2     | S1         | S2     |   | S1             | S2     |   | S1              | S2     |
| Positive traits    | 0.11*  | 0.10*  | 0.20*      | 0.19*  | † | 0.16*          | 0.15*  | ‡ | 0.07*           | 0.08*  |
| Negative traits    | -0.13* | -0.11* | -0.25*     | -0.24* | † | -0.13*         | -0.14* | ‡ | -0.05*          | -0.05* |
| Ingroup preference | 0.04*  | 0.03*  | 0.08*      | 0.09*  |   | 0.11*          | 0.09*  | ‡ | -0.12*          | -0.11* |
| Interp. morality   | 0.06*  | 0.06*  | 0.23*      | 0.23*  | † | 0.13*          | 0.11*  | ‡ | 0.04*           | 0.05*  |
| Material morality  | -0.11* | -0.13* | 0.04*      | 0.04*  | † | 0.00           | -0.01  |   | 0.03*           | 0.03*  |
| General morality   | 0.01   | 0.01   | 0.26*      | 0.27*  | † | 0.15*          | 0.15*  |   | 0.15*           | 0.15*  |

240  
241  
242  
243  
244  
245  
246  
247

Note. Values are Pearson's correlation coefficients, Nat.: national, Intl.: international, S1: subsample 1, S2: subsample 2, Interp. morality: Interpersonal morality; \* indicates significance at  $p < 0.01$  Bonferroni-corrected across all 24 correlations in each subsample, † indicates a significant difference between the correlations with distancing and national donations in both subsamples, ‡ indicates a significant difference between the correlations with national donations and international donations (comparisons between distancing and international donations not shown)  $p < 0.0001$  Bonferroni-corrected across 18 comparisons in each subsample.

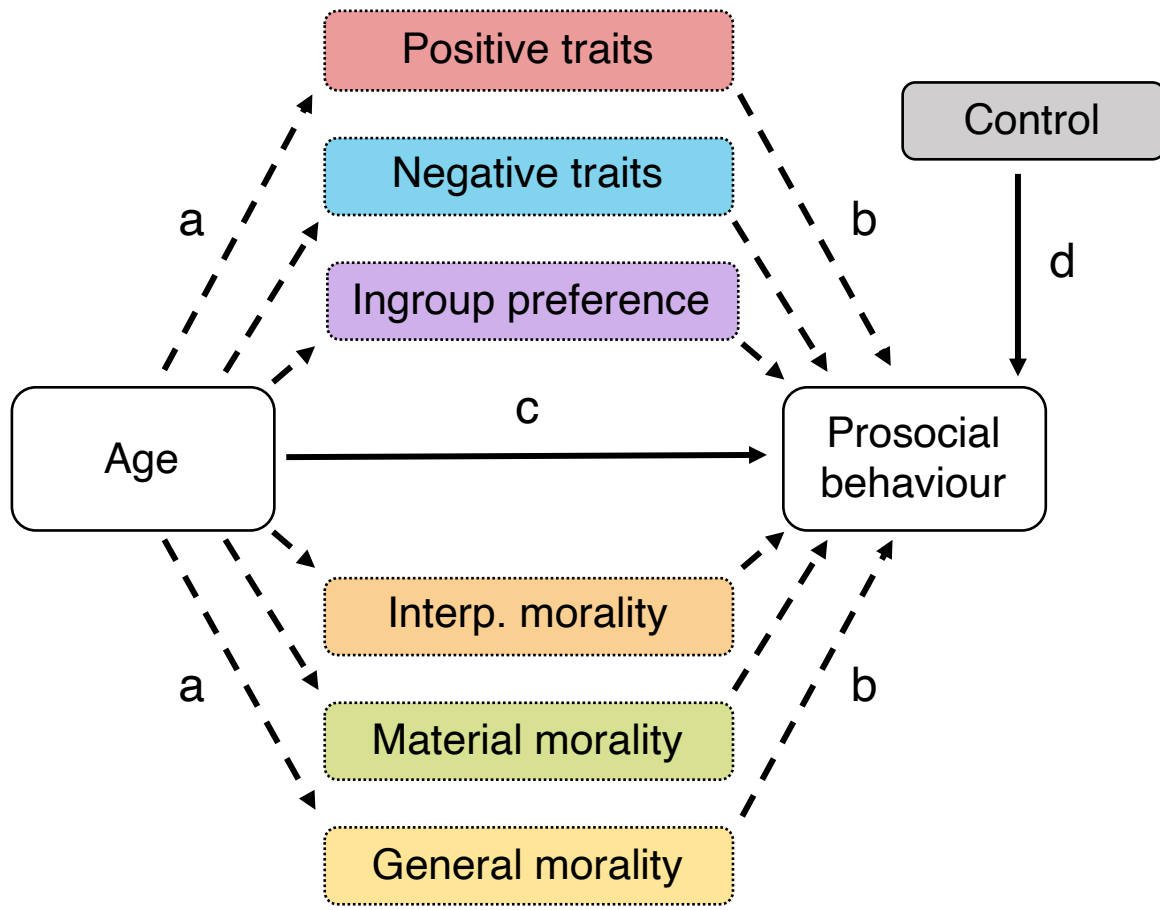

248  
 249  
 250  
 251  
 252  
 253  
 254  
 255  
 256  
 257  
 258

**Fig. S6 Structural equation model of age effects on prosocial behaviour including trait factors and control variable.** For each measure of prosocial behaviour (distancing, national donations, international donations) we included **a**) paths from age to the six trait factors, **b**) paths from the trait factors to the prosocial behaviour, **c**) a direct path from age to the prosocial behaviour, and **d**) a path from the control variable to prosocial behaviour. For distancing the control variable was perceived risk and for both national and international donations it was subjective wealth as in the main models. The indirect effects are  $a \cdot b$  for each trait factor, the product of the dashed paths (see Table S9). Direct effects are shown with solid lines. Interp. morality: Interpersonal morality.

259  
260

**Table S9.**  
Paths coefficients from structural equation models

|                                             | Distancing |        | Nat. donations |        | Intl. donations |        |
|---------------------------------------------|------------|--------|----------------|--------|-----------------|--------|
|                                             | S1         | S2     | S1             | S2     | S1              | S2     |
| <b>a) Age → factor</b>                      |            |        |                |        |                 |        |
| Positive traits                             | 0.11*      | 0.10*  | 0.11*          | 0.10*  | 0.11*           | 0.10*  |
| Negative traits                             | -0.13*     | -0.11* | -0.13*         | -0.11* | -0.12*          | -0.11* |
| Ingroup preference                          | 0.04*      | 0.03*  | 0.04*          | 0.03*  | 0.04*           | 0.03*  |
| Interpersonal morality                      | 0.06*      | 0.06*  | 0.05*          | 0.05*  | 0.05*           | 0.05*  |
| Material morality                           | -0.11*     | -0.13* | -0.11*         | -0.13* | -0.11*          | -0.13* |
| General morality                            | 0.01       | 0.01   | 0.01           | 0.01   | 0.01            | 0.01   |
| <b>b) Factor → prosocial behaviour</b>      |            |        |                |        |                 |        |
| Positive traits                             | 0.03*      | 0.02   | 0.04*          | 0.02   | 0.05*           | 0.05*  |
| Negative traits                             | -0.26*     | -0.25* | -0.16*         | -0.16* | 0.06*           | 0.06*  |
| Ingroup preference                          | 0.11*      | 0.11*  | 0.15*          | 0.13*  | -0.18*          | -0.18* |
| Interpersonal morality                      | 0.07*      | 0.08*  | 0.02           | 0.01   | 0.01            | 0.02   |
| Material morality                           | 0.06*      | 0.05*  | 0.01           | 0.00   | 0.00            | 0.00   |
| General morality                            | 0.14*      | 0.15*  | 0.07*          | 0.08*  | 0.19*           | 0.20*  |
| <b>c) Age → prosocial behaviour</b>         |            |        |                |        |                 |        |
|                                             | 0.04*      | 0.04*  | 0.03*          | 0.02*  | -0.08*          | -0.07* |
| <b>Total effect of interest (a * b + c)</b> |            |        |                |        |                 |        |
|                                             | 0.08*      | 0.07*  | 0.06*          | 0.05*  | -0.09*          | -0.07* |
| <b>d) Control → prosocial behaviour</b>     |            |        |                |        |                 |        |
|                                             | 0.04*      | 0.03*  | -0.05*         | -0.06* | -0.04*          | -0.04* |

261 Note. Nat.: national, Intl.: international, S1: subsample 1, S2: subsample 2; values are  
 262 standardised coefficients from structural equation models. A structural equation model was  
 263 created for each prosocial behaviour – distancing, national donations, and international  
 264 donations – separately. Each included **a)** paths from age to the trait factors, **b)** paths from the  
 265 trait factor to the prosocial behaviour, **c)** a direct path from age to the prosocial behaviour, and  
 266 **d)** a path from the control variable to prosocial behaviour (see Fig. S6). As in the main linear  
 267 mixed-effects models, the control variable was perceived risk for distancing and subjective  
 268 wealth for both national and international donations. We Bonferroni-corrected the significance  
 269 values across all paths of that type from all three models in each subsample. For example, all  
 270 18 “b” paths, all six “c” paths. \* indicates a significant path at  $p < 0.01$  corrected. We also applied  
 271 a threshold of  $p < 0.01$  Bonferroni-corrected to the 18 indirect effects (a\*b) in each subsample.  
 272 Indirect paths (a & b) where the overall indirect effect (a\*b) was not significant are in grey (for  
 273 example general morality significantly predicted prosocial behaviour but general morality is  
 274 not predicted by age so there is no indirect effect).  
 275

276 **Table S10.**  
 277 Results from linear mixed-effects models excluding participants who reported being a student

| <b>Distancing</b>           | <b>Subsample 1</b> |        |       |          |          |          | <b>Subsample 2</b> |        |       |          |          |          |
|-----------------------------|--------------------|--------|-------|----------|----------|----------|--------------------|--------|-------|----------|----------|----------|
|                             | beta               | CI low | CI up | <i>t</i> | df       | <i>p</i> | beta               | CI low | CI up | <i>t</i> | df       | <i>p</i> |
| Intercept                   | -0.1               | -0.17  | -0.03 | -2.94    | 71.84    | 0.004    | -0.08              | -0.15  | -0.01 | -2.33    | 71.63    | 0.02     |
| Gender (F > M)              | 0.28               | 0.25   | 0.30  | 20.13    | 19960.82 | <0.001   | 0.28               | 0.25   | 0.30  | 20.14    | 19959.09 | <0.001   |
| Perceived risk              | 0.02               | 0.00   | 0.05  | 1.64     | 50.75    | 0.11     | 0.02               | 0.00   | 0.05  | 1.96     | 47.56    | 0.06     |
| Age                         | 0.10               | 0.07   | 0.14  | 6.29     | 55.61    | <0.001   | 0.10               | 0.07   | 0.13  | 6.59     | 45.68    | <0.001   |
| <b>Total donations</b>      |                    |        |       |          |          |          |                    |        |       |          |          |          |
| Intercept                   | -0.08              | -0.15  | 0.00  | -1.99    | 74.12    | 0.05     | -0.05              | -0.13  | 0.02  | -1.37    | 75.22    | 0.17     |
| Gender (F > M)              | 0.14               | 0.11   | 0.16  | 9.94     | 19961.05 | <0.001   | 0.14               | 0.12   | 0.17  | 10.63    | 20005.64 | <0.001   |
| Subjective wealth           | -0.08              | -0.10  | -0.06 | -7.70    | 40.12    | <0.001   | -0.09              | -0.11  | -0.06 | -6.47    | 51.45    | <0.001   |
| Age (linear)                | 0.06               | 0.04   | 0.08  | 6.48     | 50.47    | <0.001   | 0.06               | 0.04   | 0.07  | 6.12     | 47.21    | <0.001   |
| Age (quadratic)             | 0.05               | 0.03   | 0.06  | 6.60     | 5215.73  | <0.001   | 0.03               | 0.02   | 0.05  | 4.72     | 5322.30  | <0.001   |
| <b>Donations by charity</b> |                    |        |       |          |          |          |                    |        |       |          |          |          |
| Intercept                   | 0.29               | 0.24   | 0.34  | 11.68    | 75.88    | <0.001   | 0.29               | 0.24   | 0.35  | 11.15    | 74.15    | <0.001   |
| Gender (F > M)              | 0.10               | 0.08   | 0.12  | 10.67    | 40741.74 | <0.001   | 0.11               | 0.10   | 0.13  | 12.41    | 41095.13 | <0.001   |
| Subjective wealth           | -0.05              | -0.07  | -0.04 | -8.42    | 47.10    | <0.001   | -0.05              | -0.07  | -0.04 | -6.35    | 49.67    | <0.001   |
| Age                         | 0.07               | 0.06   | 0.09  | 7.92     | 76.77    | <0.001   | 0.07               | 0.05   | 0.09  | 7.10     | 66.89    | <0.001   |
| Charity (I > N)             | -0.66              | -0.67  | -0.64 | -72.72   | 41243.08 | <0.001   | -0.65              | -0.67  | -0.64 | -72.60   | 41258.32 | <0.001   |
| Age * Charity               | -0.12              | -0.14  | -0.11 | -13.68   | 41243.59 | <0.001   | -0.11              | -0.12  | -0.09 | -11.75   | 41258.94 | <0.001   |

278 Note. CI low / up: 95% confidence interval lower / upper, F: female, M: male, I: international charity, N: national charity.



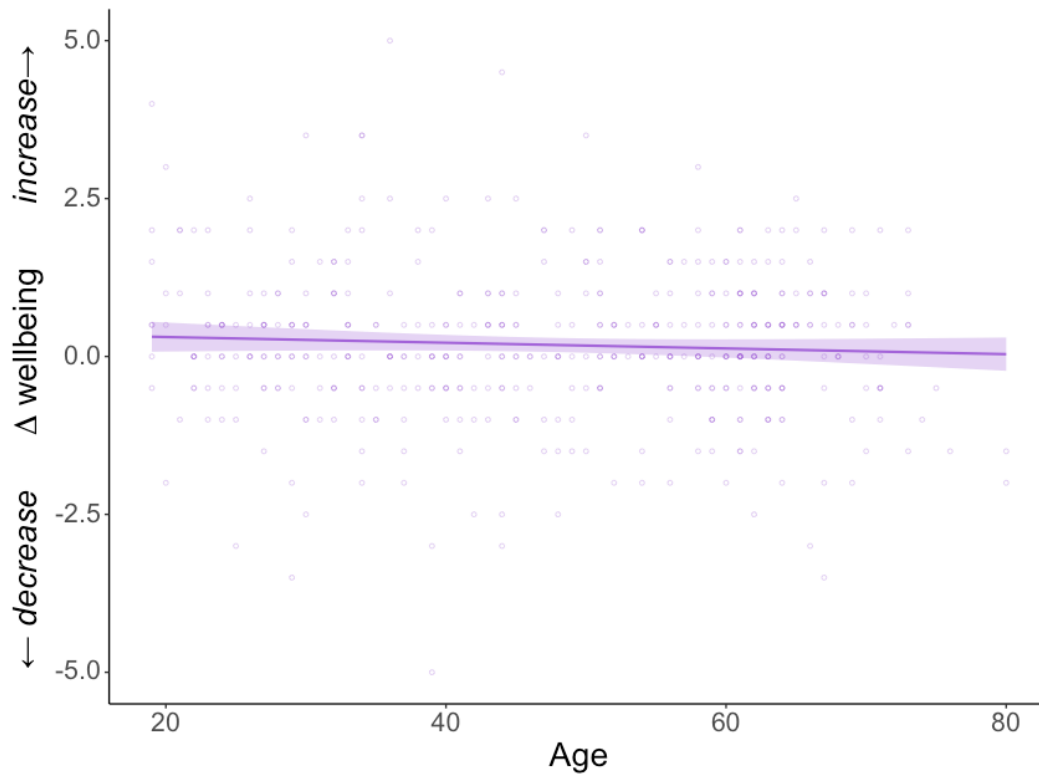

279 **Fig. S7 Change in wellbeing over a month of the COVID-19 pandemic is not**  
 280 **significantly associated with age.** For the subset of participants who completed the survey  
 281 at two time points, one month apart (n=448, UK only), we calculated a difference score for  
 282 wellbeing -  $\Delta$  wellbeing - by subtracting self-rated wellbeing at time 1 from their wellbeing at  
 283 time 2. The Pearson's correlation between  $\Delta$  wellbeing and age was not significant ( $r=-0.06$ ,  
 284  $p=0.22$ ) suggesting that any change in wellbeing over this time did not depend on age, so  
 285 could not explain our main results. Line shows fitted linear model, shaded area shows 95%  
 286 confidence interval.

287 **Supplementary references**

288

289 1. Schielzeth, H. *et al.* Robustness of linear mixed-effects models to violations of distributional  
290 assumptions. *Methods Ecol. Evol.* **11**, 1141–1152 (2020).

291 2. Harrison, F. & Mouden, C. E. Exploring the Effects of Working for Endowments on  
292 Behaviour in Standard Economic Games. *PLOS ONE* **6**, e27623 (2011).

293 3. Raihani, N. J., Mace, R. & Lamba, S. The Effect of \$1, \$5 and \$10 Stakes in an Online  
294 Dictator Game. *PLOS ONE* **8**, e73131 (2013).

295 4. Maxwell, S. E. & Cole, D. A. Bias in cross-sectional analyses of longitudinal mediation.  
296 *Psychol. Methods* **12**, 23–44 (2007).

297 5. O’Laughlin, K. D., Martin, M. J. & Ferrer, E. Cross-Sectional Analysis of Longitudinal  
298 Mediation Processes. *Multivar. Behav. Res.* **53**, 375–402 (2018).

299 6. Lindenberger, U., von Oertzen, T., Ghisletta, P. & Hertzog, C. Cross-sectional age variance  
300 extraction: What’s change got to do with it? *Psychol. Aging* **26**, 34–47 (2011).

301 7. Pek, J. & Hoyle, R. H. On the (In)Validity of Tests of Simple Mediation: Threats and  
302 Solutions: (In)Validity of Tests of Simple Mediation. *Soc. Personal. Psychol. Compass* **10**,  
303 150–163 (2016).

304 8. Gamer, M., Lemon, J. & Singh, I. F. P. *irr: Various Coefficients of Interrater Reliability and*  
305 *Agreement.* (2019).

306 9. Weir, J. P. Quantifying test-retest reliability using the intraclass correlation coefficient and  
307 the SEM. *J Strength Con Res* 231–240 (2005).

308
